# Supplementary material for: Occurrence of Sweetpotato (Ipomoea batatas) Wilt and Surface Rot Disease and Determining Resistance of Selected Varieties to the Pathogen in Korea
Source: MDPI journal article supplement (doi:10.3390/plants9040497), 2020-04-13
Supplement: s1 [file s1]

**Table S1.** Cultural and morphological characteristics (conidial characteristics) of the isolates obtained in the present study.

| Isolate Number        | Conidial Size (µm at 25 °C)    |                              | Conidial Characteristics |           |                               |       |
|-----------------------|--------------------------------|------------------------------|--------------------------|-----------|-------------------------------|-------|
|                       | Macro                          | Micro                        | Macro                    | Septa     | Micro                         | Septa |
| SPL15020              | 10.8~(25.9)~35.3×2.4~(3.7)~5.2 | 3.1~(5.7)~7.7×1.4~(2.5)~3.4  | Slightly curved          | Usually 3 | Elliptical or cylindrical     | 0     |
| SPL15023              | 13.0~(30.9)~39.5×2.1~(3.5)~4.4 | 3.8~(5.9)~7.7×1.7~(2.7)~3.7  | Slightly curved          | Usually 3 | Elliptical or cylindrical     | 0     |
| SPL15037              | 15.2~(28.2)~41.9×2.3~(3.2)~4.5 | 3.6~(6.0)~7.7×1.6~(2.2)~2.9  | Slightly curved          | Usually 3 | Elliptical or cylindrical     | 0     |
| SPL16046              | 11.1~(24.7)~34.6×4.9~(5.7)~6.9 | 4.3~(6.4)~8.3×2.2~(3.0)~3.7  | Slightly curved          | Usually 3 | Elliptical or cylindrical     | 0     |
| SPL16048              | 12.7~(21.5)~28.4×2.1~(3.9)~5.6 | 4.5~(6.3)~7.9×1.8~(2.6)~3.8  | Slightly curved          | Usually 3 | Elliptical or cylindrical     | 0     |
| SPL18019              | 14.0~(25.4)~36.8×2.6~(3.9)~5.3 | 4.3~(7.3)~10.4×2.2~(2.9)~4.1 | Slightly curved          | Usually 3 | Elliptical or cylindrical     | 0     |
| <i>F. oxysporum</i> * | 32.0~41.3×3.5~8.9              | 5.2~10.1×2.2~4.7             | Sickle-shaped            | 3 to 4    | Oval-ellipsoid to cylindrical | 0     |
